# Supplementary material
Source: publisher figshare collection journal article supplement (https://frontiersin.figshare.com/ndownloader/files/34443515)

## Supporting Informations

### Development of *Klebsiella pneumoniae* capsule polysaccharide-conjugated vaccine candidates using phage depolymerases

Tzu-Lung Lin<sup>†</sup>, Feng-Ling Yang<sup>§</sup>, Chien-Tai Ren<sup>‡</sup>, Yi-Jiun Pan<sup>†,∞</sup>, Kuo-Shiang Liao<sup>‡</sup>, I-Fan Tu<sup>§</sup>, Yu-Pei Chang<sup>§</sup>, Yang-Yu Cheng<sup>‡</sup>, Chung-Yi Wu<sup>‡,\*</sup>, Shih-Hsiung Wu<sup>§,\*</sup> and Jin-Town Wang<sup>†,‡,\*</sup>

<sup>†</sup>Department of Microbiology, National Taiwan University College of Medicine, Taipei, Taiwan

<sup>§</sup>Institute of Biological Chemistry, Academia Sinica, Taipei, Taiwan.

<sup>‡</sup>Genomics Research Center, Academia Sinica, Taipei, Taiwan.

<sup>∞</sup>Department of Microbiology, School of Medicine, China Medical University, Taichung, Taiwan.

<sup>‡</sup>Department of Internal Medicine, National Taiwan University Hospital, Taipei, Taiwan

### Purification of *K. pneumoniae* CPS

The bacteria were cultured on Luria agar plate over 12 hours at 37 °C. The bacteria lawn was scrapped, collected, put in sterilized water (w/v = 1/10), and heated at 100 °C for 10 minutes. After cooling, the bacterial solution was centrifuged at 15,000 x g for 20 minutes. The

supernatant (volume) was mixed with ice-cold acetone (4 x volumes) for polysaccharide precipitation. After centrifugation at 12,000 x g for 20 minutes, crude CPS was present in the pellet, which was suspended in sterilized water and lyophilized. The crude CPS powder was digested by ribonuclease (Roche) and deoxyribonuclease I (Roche) for 24 hours at 37 °C and then with protease K in 10 mM Tris-HCl, pH 7.4 for further 6 to 8 hours. After denaturation at 100 °C for 10 minutes, the supernatant was then dialyzed extensively against water using an 8-10 kDa cutoff membrane and lyophilized. The partial purified CPS was further purified on a TSK HW-65F column [1.6 cm (diameter) x 90 cm (height)] by eluting with 0.1% sodium azide in filtered H<sub>2</sub>O. Fractions containing carbohydrates were detected by phenol-sulfuric acid method and dialyzed against H<sub>2</sub>O (MW cutoff: 1 kDa) then concentrated by lyophilization.

### **CPS structure analysis**

**Capillary electrophoresis:** Capillary electrophoresis was performed on a Beckman P/ACE MDQ Capillary Electrophoresis system equipped with a UV detector set at 230 nm. Separation and analysis were performed by an electrokinetic chromatography coated fused-silica capillary tube (77 µm ID, 65 cm total length, and 50 cm from the injection point to the detector) at 25 °C. The operating buffer, which is consisted of sodium phosphate buffer (50 mM, pH 9.0), was degassed by vacuum filtration through a 0.2 µm membrane filter and shaken in an ultrasonic bath. Before each run, the capillary tube was washed with 0.1 M NaOH for 5 minutes and

double-distilled water for 5 minutes then conditioned with the operating buffer for 5 minutes.

The samples to be analyzed were injected automatically, using the pressure injection mode, in which the sample was pressurized for 15 seconds. Capillary electrophoresis was performed at 20 kV (about 65 mA) using a normal polarity.

**Mass spectrometry:** For MALDI MS analysis, 0.5  $\mu$ L of sample was mixed with 0.5  $\mu$ L of matrix solution [20 mg/mL 2, 5-dihydroxybenzoic acid (DHB) in 50% ACN and 1%  $\text{H}_3\text{PO}_4$ ]. Then, sample was spotted onto stainless steel plates, air-dried, and then analyzed on a 4800 MALDI TOF/TOF Analyzer (Applied Biosystems, Foster City, CA). The analysis was carried out in positive reflector mode with an acceleration voltage of 20 kV, 16% grid voltage. A typical spectrum was generated by 1,000 laser shots. The raw spectra were processed by baseline subtraction and noise removal using Data-Explorer software (Applied Biosystems). For mass spectrum analysis, measurements were performed on an Ultraflex II MALDI-TOF/TOF mass spectrometer (Bruker Daltonik GmbH, Germany). Mass spectra were obtained in the range of mass to charge ratio ( $m/z$ ) from 500 to 4,000 with reflector mode. MS/MS analysis was performed in the LIFT mode. Mass spectrometry analyses were performed in GRC Mass Core Facility of Genomics Research Center, Academia Sinica, Taipei, Taiwan.

**NMR spectra:** The NMR spectra of small CPS fragments in  $\text{D}_2\text{O}$  were recorded; all two-dimensional NMR experiments were carried out with standard pulse sequences provided by Bruker. NMR data were processed using topspin 3.1. NMR experiments and resonance

assignments: All NMR experiments are carried out on a Bruker AVANCE 600 or AVANCE 800 NMR spectrometer (Bruker, Karlsruhe, Germany) equipped with a triple ( $^1\text{H}$ ,  $^{13}\text{C}$ , and  $^{15}\text{N}$ ) resonance cryoprobe, including a shielded z-gradient. Two dimensional (2D)  $^1\text{H}$ NMR, TOCSY and NOESY spectra are collected. All heteronuclear NMR experiments for recombinant protein were carried out as required. Sequence-specific assignment of the backbone atoms is achieved by independent connectivity analysis of CBCA(CO)NH, HNCACB, HNCO, HN(CA)CO, and C(CO)NH. The  $^1\text{H}$  resonances are assigned using 3D HAHB(CO)NH and HCCH-TOCSY.

#### **Conjugations of digested K1 or K2 CPS with DT-CRM197 carrier protein**

##### **General procedure for the preparation of glycosyl amines via Kochetkov amination:**

Ammonium carbonate (3.0 g, excess) was added to a solution of reducing sugar (20 mg) in 3.0 mL of DD water. The resulting suspension was sealed and stirred at room temperature for 7 days. The reaction mixture was freeze-dried until the dry weight of the residue stayed constant. The glycosyl amines were obtained as colorless solids and used without further purification.

**General procedure for the attachment of thiol linker via glycosyl amine:** DTSSP (20 mg, excess) was added to a solution of the above glycosyl amines (20 mg) in 3.0 mL of PBS buffer (pH 7.4). The reaction mixture was maintained at pH 7.4 to 7.8 by adding 1M NaOH solution and stirred at room temperature for 16 hrs. Then, DTT (20 mg, excess) was added to the above

solution, and the mixture was stirred at 40 °C for 1 to 2 hrs. The solvent was removed under reduced pressure, and the residue was purified by chromatography on a column of Sephadex LH-20 eluted with DD water to afford the desired products K1/K2 digested CPS-SH (12-15 mg, 60-75% overall) as a colorless solid.

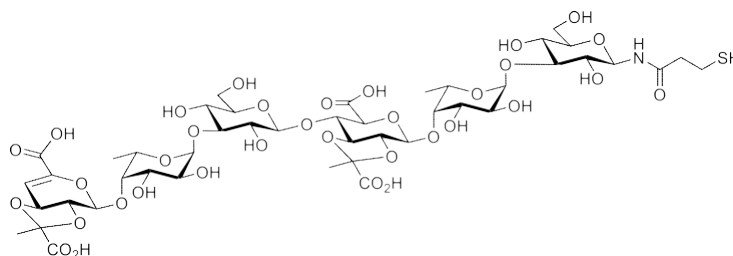

**K1-digested CPS-SH:**  $^1\text{H}$  NMR (400 MHz,  $\text{D}_2\text{O}$ ):  $\delta$  = 6.20 (d,  $J$  = 1.9 Hz, 0.5 H), 5.73 (d,  $J$  = 8.4 Hz, 0.5 H), 5.39-5.30 (m, 2.4 H), 5.07-4.98 (m, 2.4 H), 4.68 (d,  $J$  = 7.7 Hz, 1.8 H), 4.55

(dd,  $J$  = 1.9, 9.4 Hz, 1 H), 4.51-4.36 (m, 4.5 H), 4.22 (m, 0.7 H), 4.15-4.04 (m, 3.4 H), 4.05-3.45 (m, 26.3 H), 2.84 (dd,  $J$  = 6.4, 6.8 Hz, 2 H), 2.72-2.67 (m, 1.7 H), 1.65 (s, 1.27 H), 1.62 (s, 3.7 H), 1.36-1.26 (m, 5.9 H), 1.22 (d,  $J$  = 6.6 Hz, 1.7 H) ppm;  $^{13}\text{C}$  NMR (150 MHz,  $\text{CDCl}_3$ ):  $\delta$  176.4, 175.7, 175.2, 146.8, 111.1, 109.1, 109.0, 104.8, 102.8, 102.3, 102.2, 101.6, 99.4, 99.3, 99.2, 99.1, 82.6, 81.7, 81.6, 81.5, 80.2, 79.5, 79.1, 79.0, 78.9, 78.8, 78.7, 78.1, 77.6, 76.0, 75.4, 75.3, 74.4, 73.8, 73.6, 72.3, 71.9, 69.5, 68.9, 68.8, 68.7, 68.3, 68.2, 67.8, 66.8, 66.7, 66.6, 61.0, 60.6, 39.3, 38.0, 26.7, 22.6, 19.4, 18.9, 15.2, 15.0; HRMS (ESI-TOF):  $m/z$  calcd for  $\text{C}_{45}\text{H}_{68}\text{NO}_{36}\text{S}$  1214.3214; found 1215.3060 ( $\text{M}+\text{H}+\text{H}_2\text{O}$ ) $^+$ .

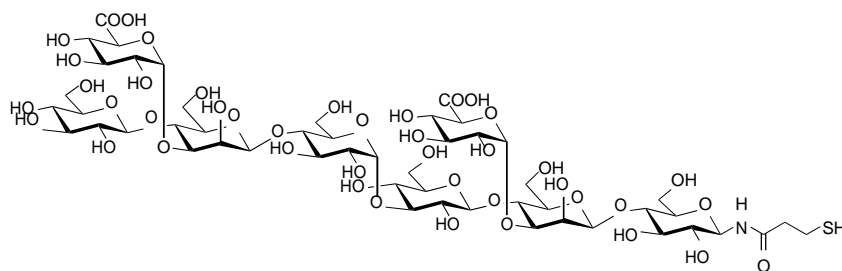

**K2-digested CPS-SH:**  $^1\text{H}$  NMR (600 MHz,  $\text{D}_2\text{O}$ ):  $\delta$  = 5.38 (d,  $J$  = 3.8 Hz, 1 H), 5.34 (d,  $J$  = 4.0 Hz, 0.2 H), 5.30 (m, 2 H), 5.21 (d,  $J$  = 3.8 Hz, 0.9 H), 5.02 (d,  $J$  = 9.4 Hz, 1 H), 4.58 (d,  $J$  = 8.0 Hz, 0.2 H), 4.54 (d,  $J$  = 8.0 Hz, 0.8 H), 4.34-4.28 (m, 2.3 H), 4.25-4.16 (m, 2.6 H), 4.14-3.43 (m, 42 H), 3.38 (t,  $J$  = 8.7 Hz, 1 H), 2.81 (dd,  $J$  = 6.6, 6.8 Hz, 2 H), 2.66 (m, 2H) ppm;  $^{13}\text{C}$  NMR (150 MHz,  $\text{CDCl}_3$ ):  $\delta$  176.5, 176.4, 175.7, 102.4, 101.6, 100.6, 99.9, 99.7, 99.1, 99.0, 82.9, 82.4, 81.1, 81.0, 80.9, 80.7, 79.4, 78.6, 77.3, 76.3, 76.1, 75.4, 73.5, 73.0, 72.6, 72.2, 72.0, 71.8, 71.6, 71.5, 71.4, 71.3, 71.2, 70.8, 70.6, 70.3, 70.2, 70.0, 69.8, 66.0, 65.9, 65.4, 61.0, 60.9, 60.4, 59.9, 59.7, 39.3, 36.1, 19.4; HRMS (ESI-TOF):  $m/z$  calcd for  $\text{C}_{51}\text{H}_{83}\text{NO}_{43}\text{SNa}$  1452.3957; found 1452.3964 ( $\text{M}+\text{Na}$ ) $^+$ ; calcd for  $\text{C}_{51}\text{H}_{83}\text{NO}_{43}\text{S}$  1429.4060; found 1430.4155 ( $\text{M}+\text{H}$ ) $^+$ .

**The synthesis of CRM197-maleimid:** After the salt of commercial CRM197 (1.0 mg) was removed via alternate dissolving in water and dialyzing (Amicon Ultra-0.5, 10 kDa), the residue was dissolved in PBS buffer (pH 6.5, 1.0 mL) and transferred into a sample vial. Sulfo-EMCS (1.0 mg,  $8.22 \times 10^{-6}$  mol) was added to the solution, and then the reaction was kept stirring at room temperature for 2 hours. The mixture was purified by Amicon Ultra-0.5 (10 kDa). After using MALDI-TOF to check the molecular weight and BCA assay to calculate the amount of protein, the CRM197-maleimid was stored in PBS buffer (pH 7.2, 1.0 mg/mL) for next step. The amount of maleimid function groups could be calculated based on the MALDI-TOF data. For example, with the known molecular weight of CRM197-maleimid 61841, the numbers of maleimide function groups on CRM197-maleimid can be calculated.

**The synthesis of K1/K2 digested CPS-CRM197 Conjugates (1~4):** The CRM197-maleimids were dissolved in PBS buffer (pH 7.2, 1.0 mg/mL), and then different amounts of K1/K2 digested CPS-SH (5.0 mg/mL in PBS buffer, pH 7.2) were added into the solution. The mixtures were stirred at room temperature for 2 hours. The K1/K2 digested CPS-CRM197

conjugates were purified by Amicon Ultra-0.5 (10 kDa) to remove the nonreactive K1/K2 digested CPS-SH and sodium phosphate salt via dialysis. The obtained K1/K2 digested CPS-CRM197 conjugates were characterized by MALDI-TOF analysis to determine the carbohydrate incorporation rate. The nonreactive K1/K2 digested CPS-SH could be recovered after reacting with DTT and purifying by LH-20 column chromatography. By changing the amount of K1/K2 digested CPS-SH used, we can conjugate different epitope ratio of K1/K2 oligosaccharides to the CRM197 carrier.

**Supplementary Figure 1.** The mass and capillary electrophoresis analysis of K1 CPS

digested by K1-ORF34 protein. (A) Mass distribution of K1 CPS cleaved by K1-ORF34 and Biogel P6 separation. (B) Capillary electrophoresis of K1 CPS cleaved by K1-ORF34 protein. (C) MS-MS spectra of K1 CPS fragment (MW 1,145). (D)  $^1\text{H}$ -NMR of K1-oligosaccharides.

**A**

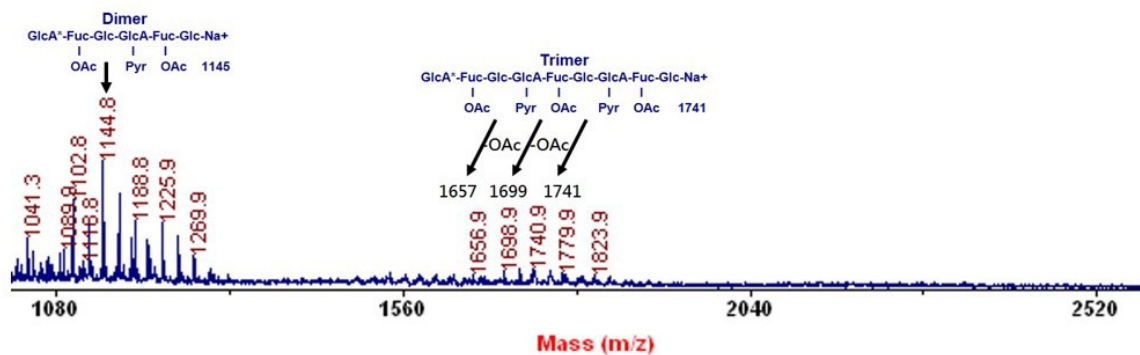

**B**

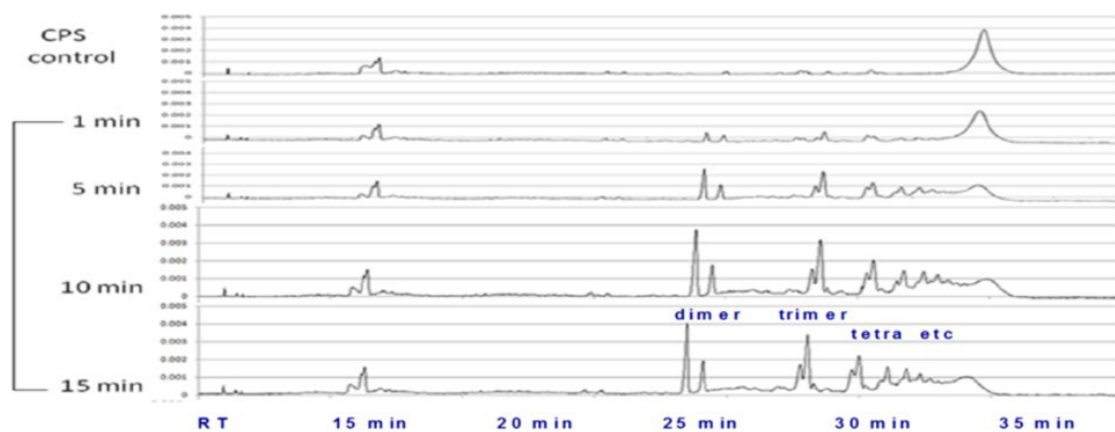



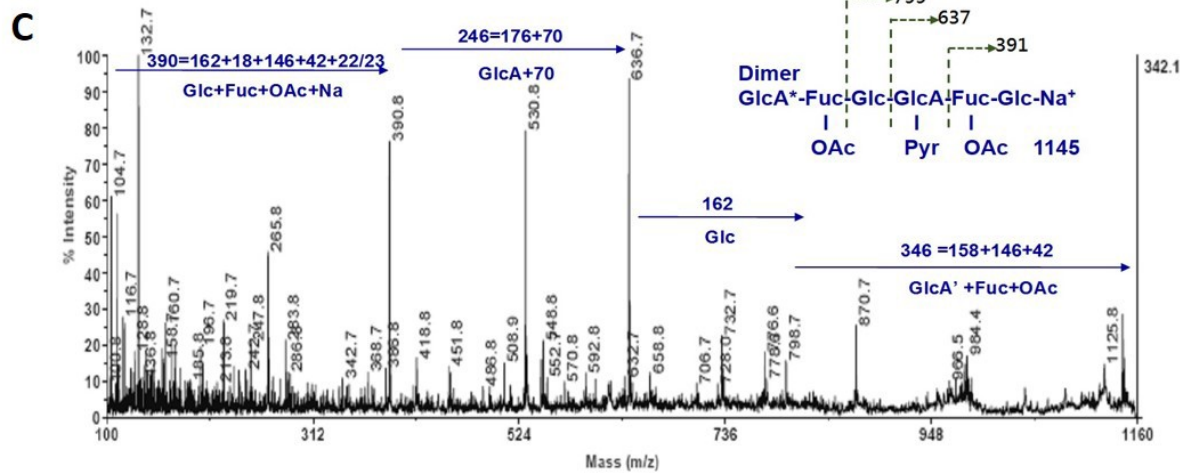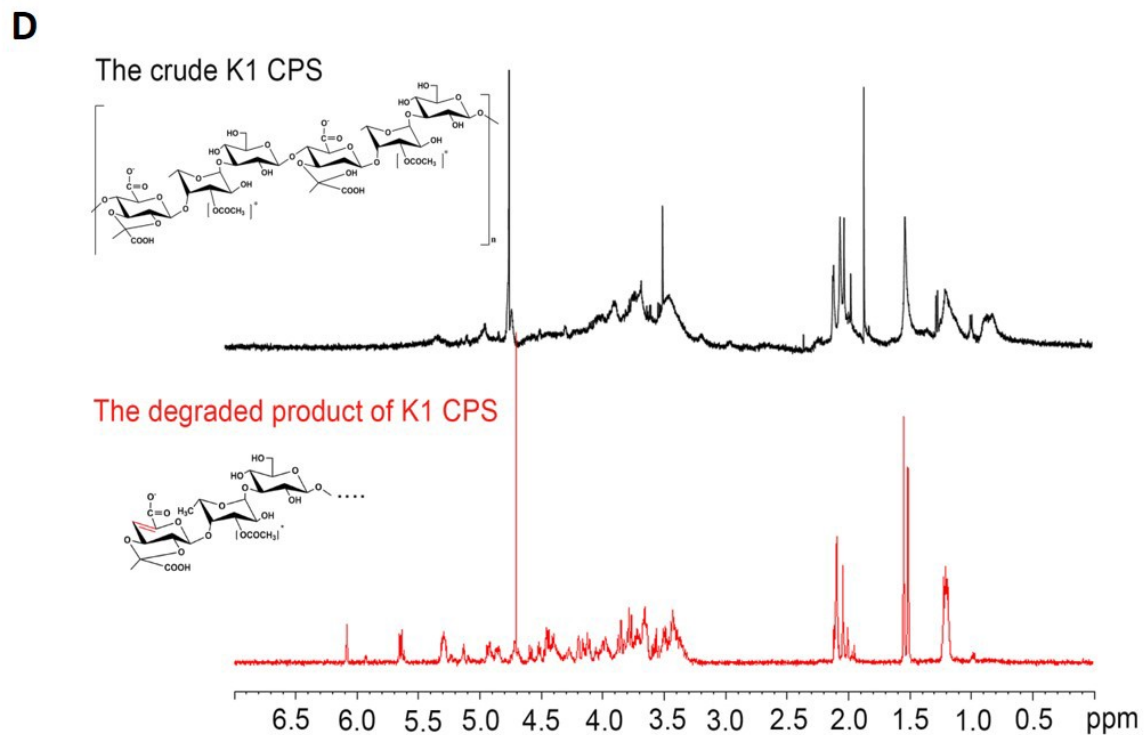

**Supplementary Figure 2.** The structure analysis of K2 CPS digested by K2-ORF16 protein.

(A) The MALDI-TOF spectra of K2 CPS digested by K2-ORF16 protein. (B) ESI-MS/MS analysis of  $m/z$  at 703 and (C) at 1365. (D)  $^{13}\text{C}$  NMR spectrum (100 MHz) of K2 oligosaccharide ( $\text{D}_2\text{O}$ , 323 K). (E) HSQC spectrum of K2 oligosaccharide. (F) Structure of K2 oligosaccharide.

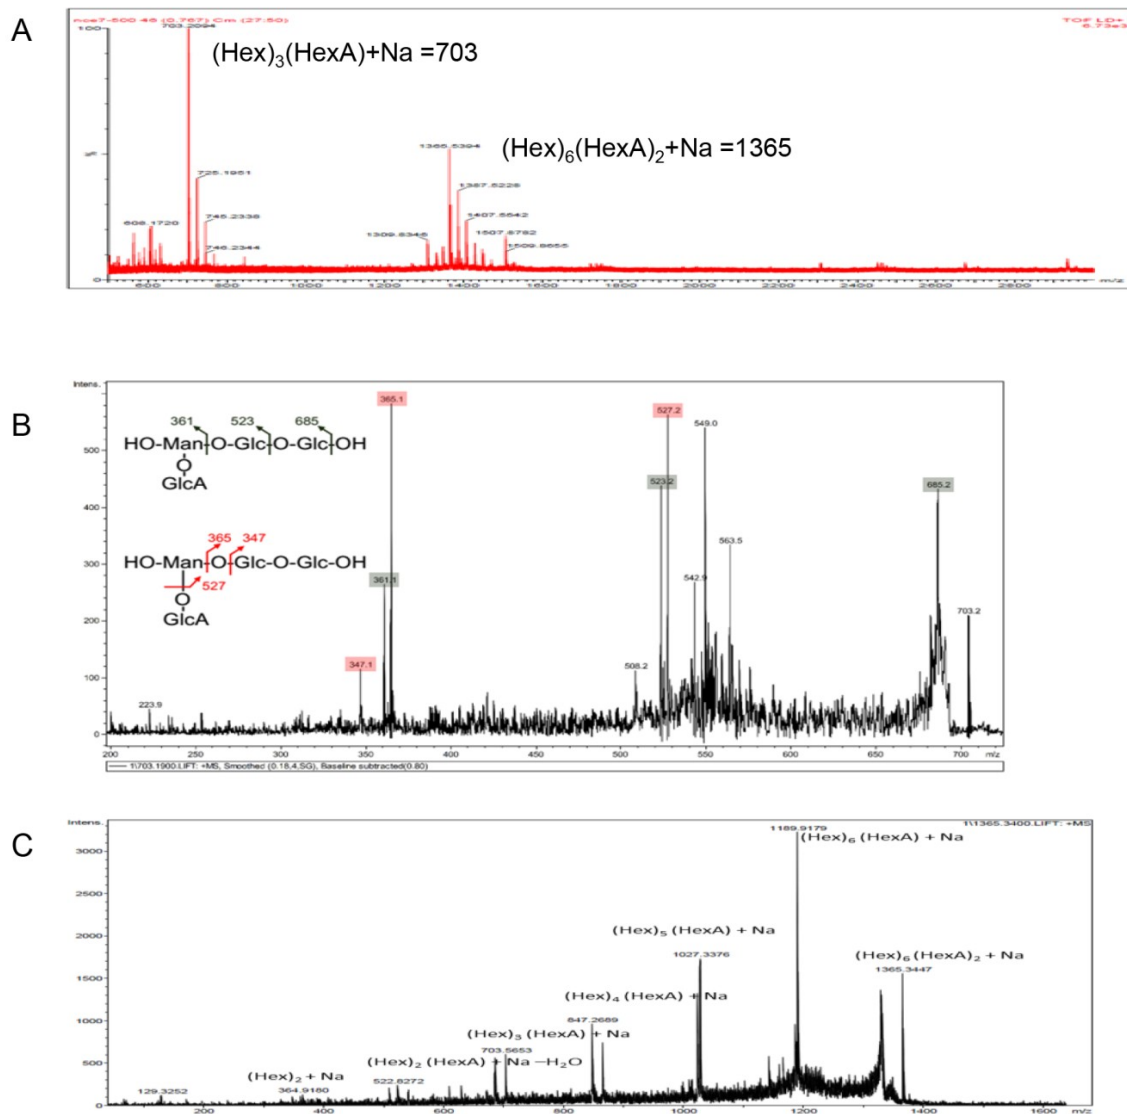

D

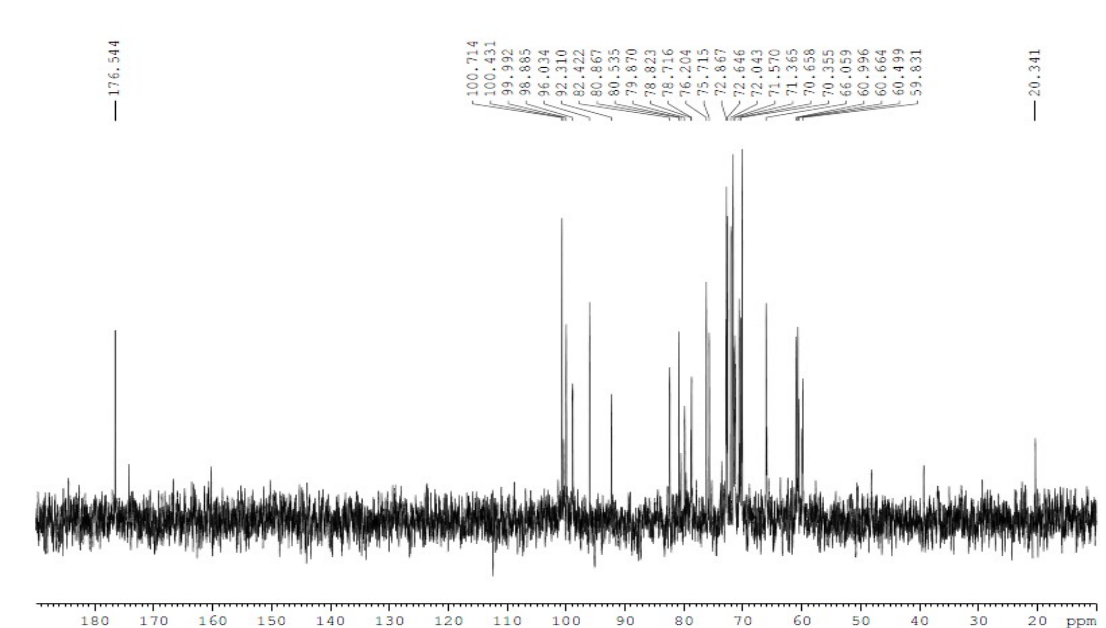

E

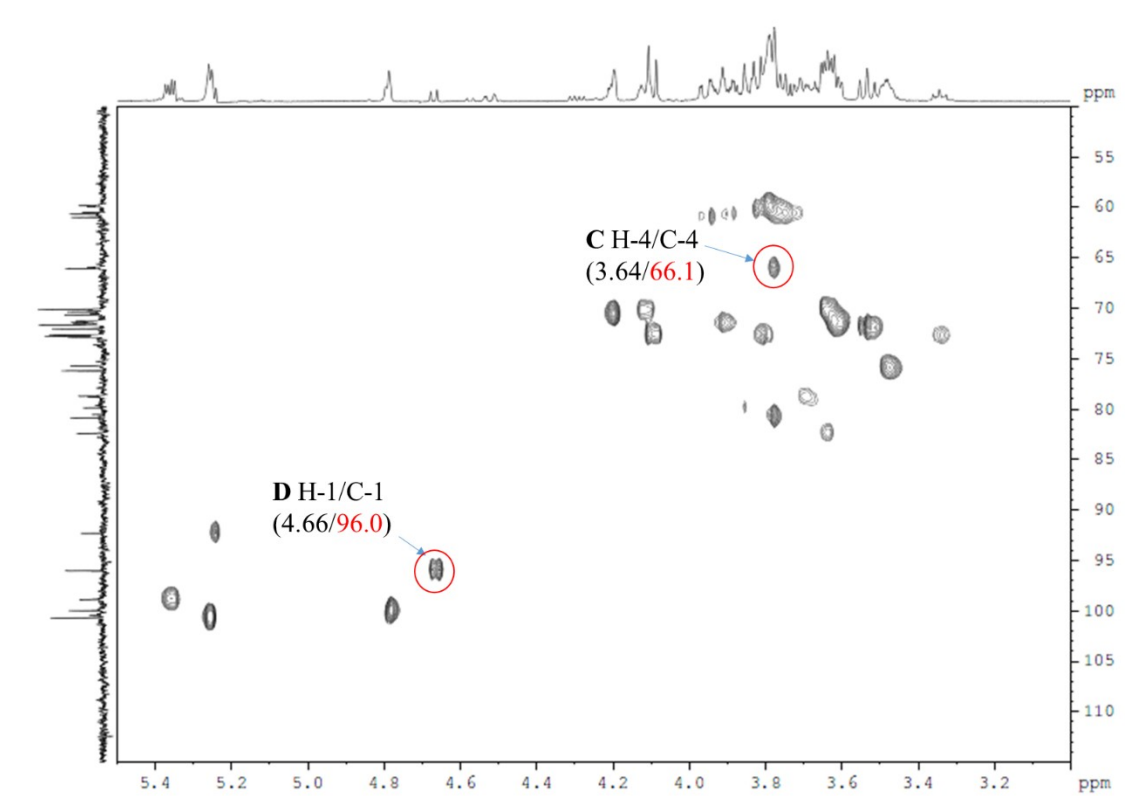

F

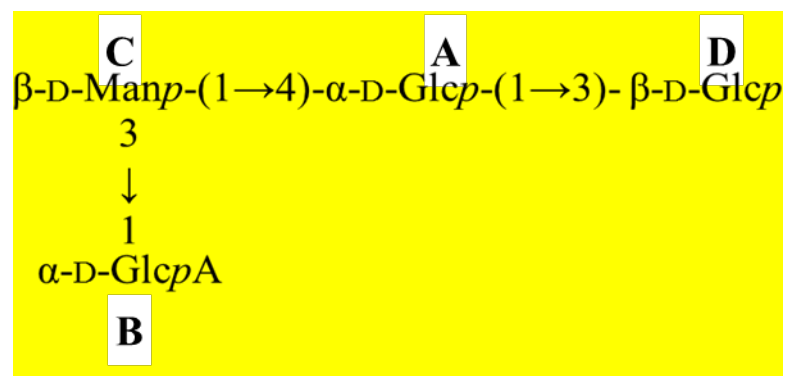

**Supplementary Figure 3.** The MALDI-TOF result of DT (top), linker (Sulfo-EMCS) conjugated to DT (middle), and K1 conjugated to linker of DT (down).

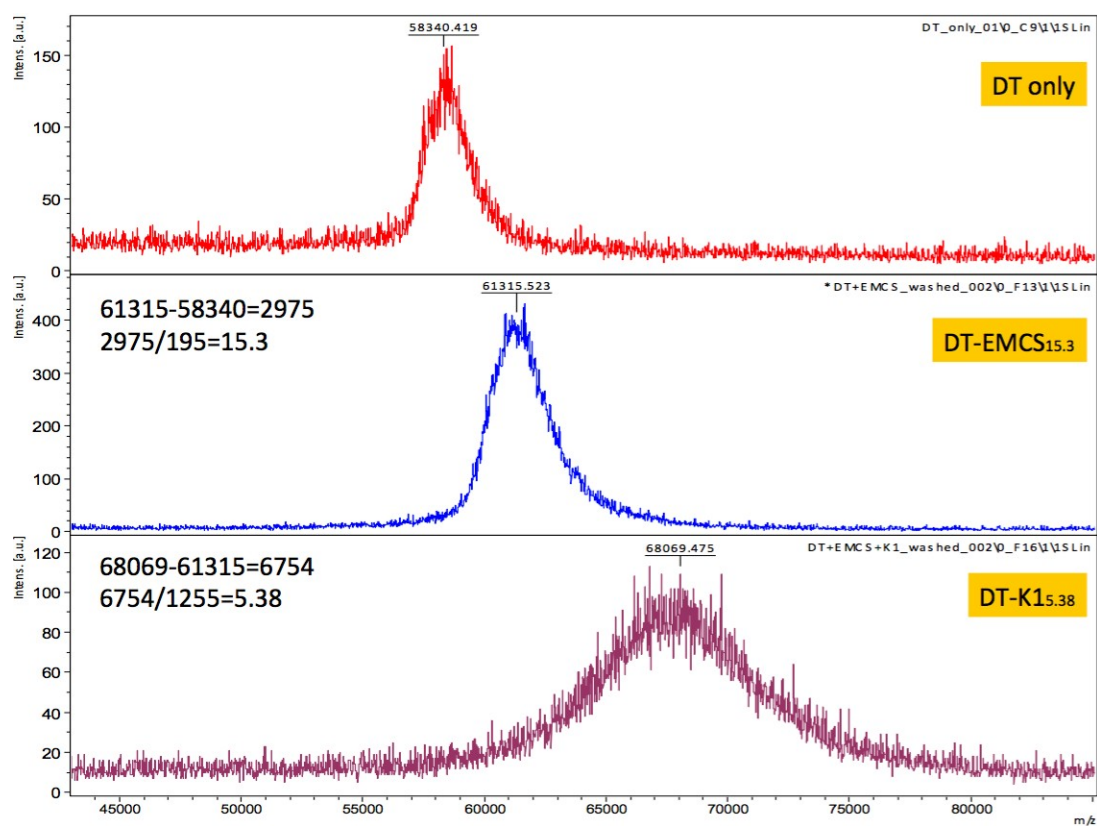

**Supplementary Figure 4.** The MALDI-TOF result of DT (top), linker (Sulfo-EMCS)

conjugated to DT (middle), and K2 conjugated to linker of DT (down).

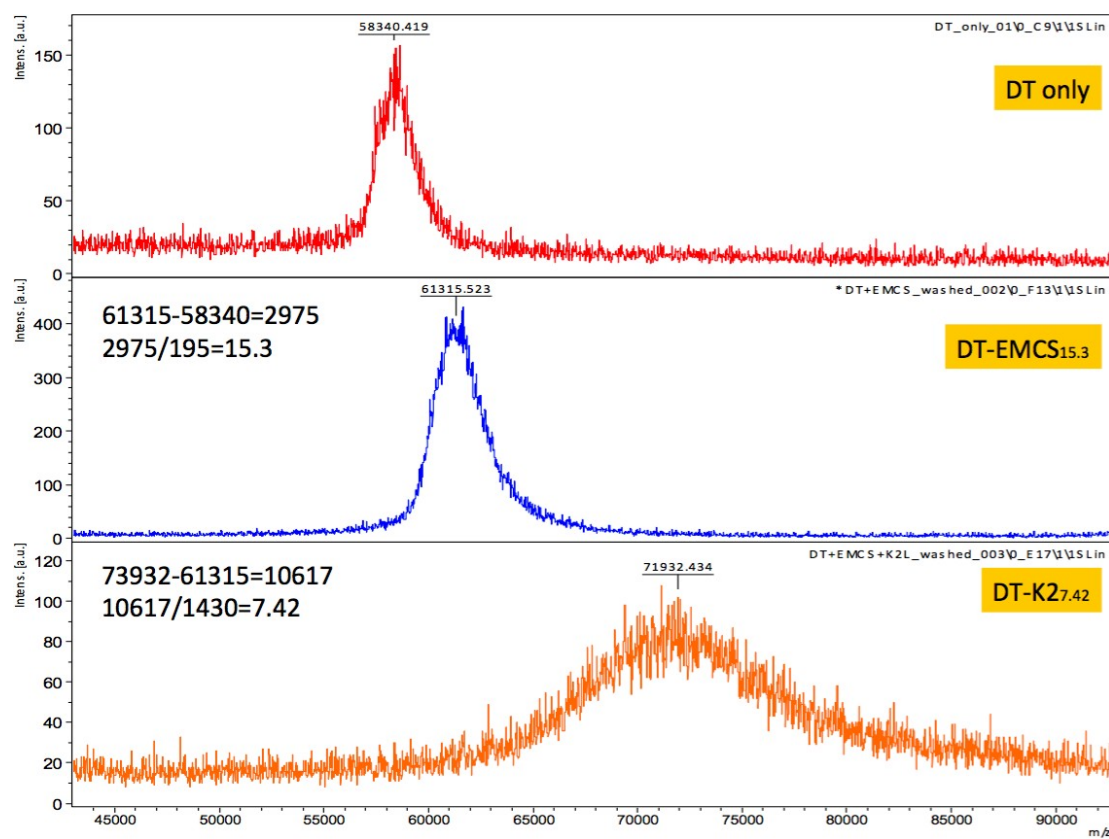

**Supplementary Figure 5.** The glycan array result of K1 vaccination induced IgG serogroups analysis.

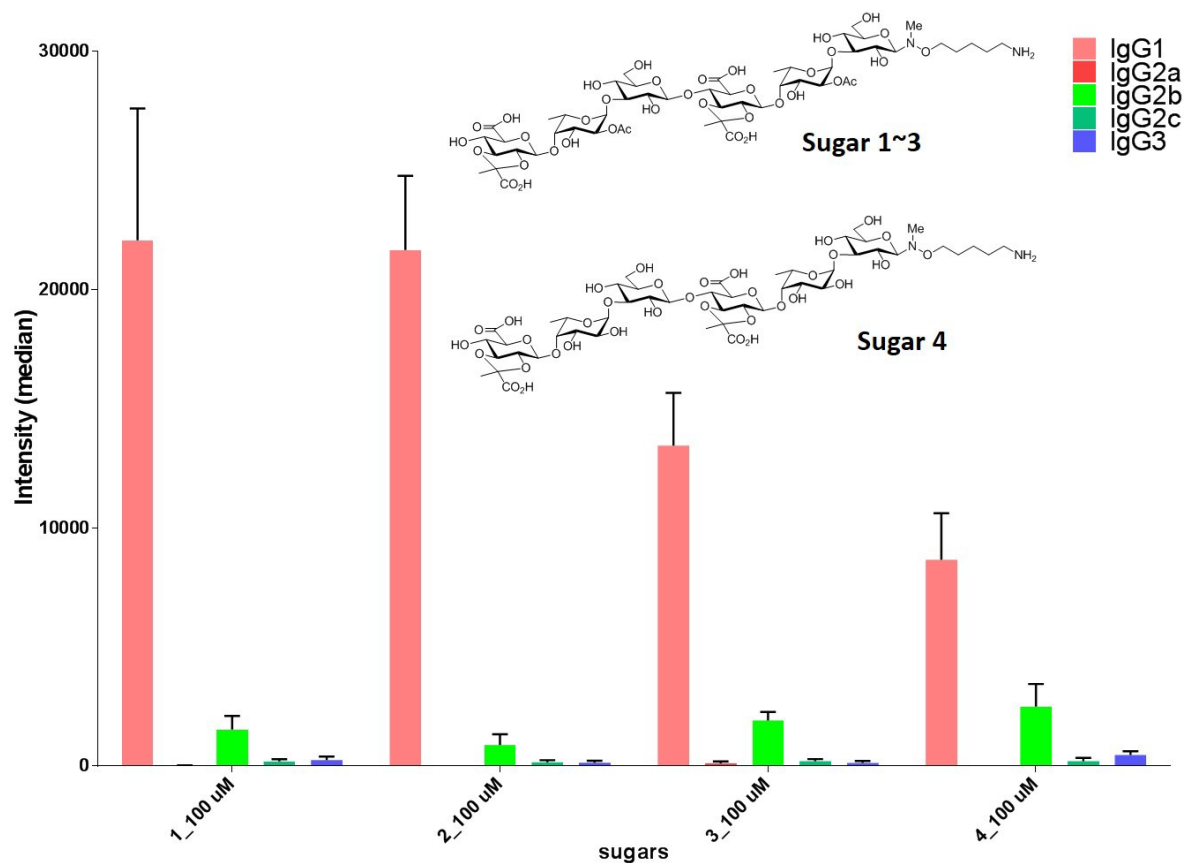

**Supplementary Table I.**  $^1\text{H}$  and  $^{13}\text{C}$  chemical shifts of K2 oligosaccharide

| Residues & linkage                              | Chemical shift ( $\delta$ ppm) |            |            |            |            |                  |
|-------------------------------------------------|--------------------------------|------------|------------|------------|------------|------------------|
|                                                 | H-1/C-1                        | H-2/C-2    | H-3/C-3    | H-4/C-4    | H-5/C-5    | H-6/C-6          |
| <b>A.</b> 4- $\alpha$ -D-Glcp- (1 $\rightarrow$ | 5.35/ 98.9                     | 3.61/ 71.4 | 3.90/ 71.7 | 3.72/ 78.7 | 4.11; 70.4 | 3.78; 3.78/ 59.8 |
| <b>B.</b> T- $\alpha$ -D-GlcAp                  | 5.25/ 100.7                    | 3.60/ 71.7 | 3.81/ 75.3 | 3.52/ 72.1 | 4.07/ 72.8 | -/176.5          |
| <b>C.</b> 3)- $\beta$ -D-Manp- (1 $\rightarrow$ | 4.78/ 100.0                    | 4.19/ 70.7 | 3.78/ 80.9 | 3.74/ 66.1 | 3.47/ 75.7 | 3.84; 3.94/ 60.7 |
| <b>D.</b> T- $\beta$ -D-Manp                    | 4.66/ 96.0                     | 3.34/ 72.7 | 3.64/ 82.4 | 3.46/ 72.1 | 3.46/ 76.2 | 3.66; 3.90/ 60.5 |

**Supplementary Figure 6: Methods for the preparation of conjugated vaccines.** (A) state-of-the-art technologies. (B) The new method reported by this study.

#### A. State-of-the art production technologies for conjugated vaccines

##### 1. Traditional method: vaccines are prepared using CPS purified from bacterial cultures.

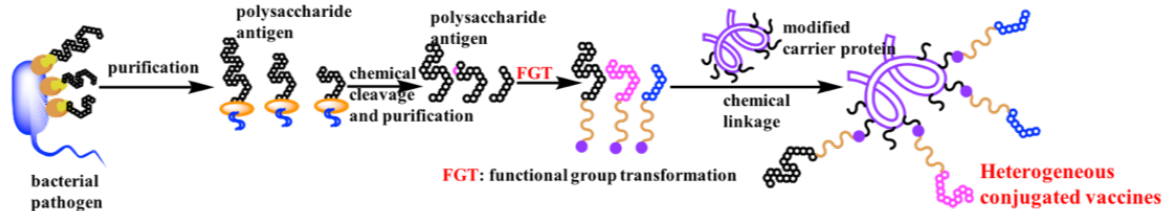

##### 2. Total chemical synthesis

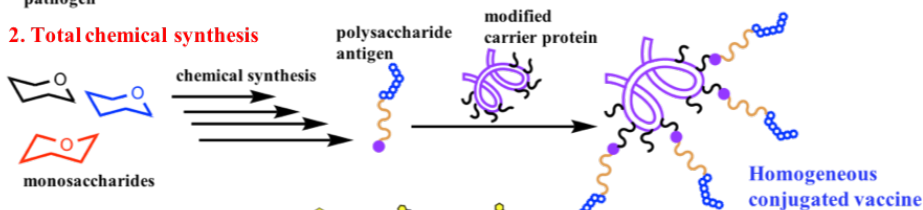

##### 3. *in vivo* biosynthesis

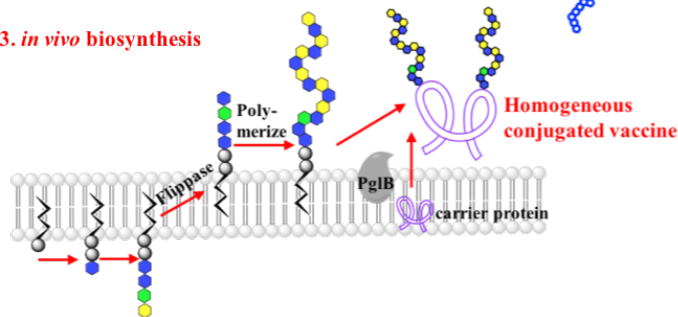

#### B. Method reported by this study.

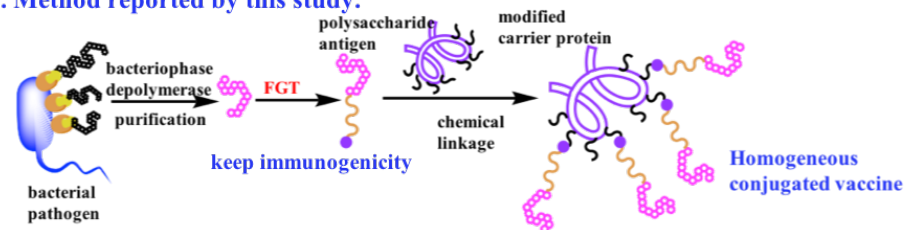

# <sup>1</sup>H NMR spectra of K1-digested CPS-SH

K1L

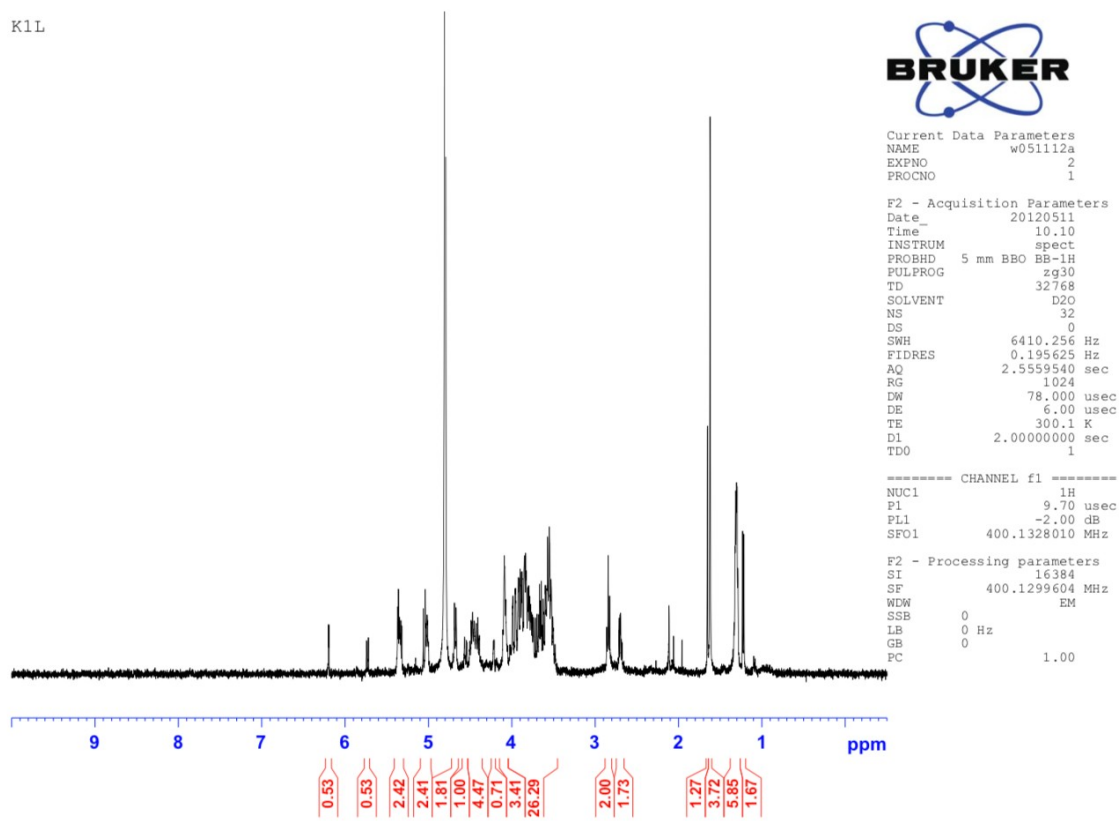



# **<sup>13</sup>C NMR spectra of K1-digested CPS-SH**

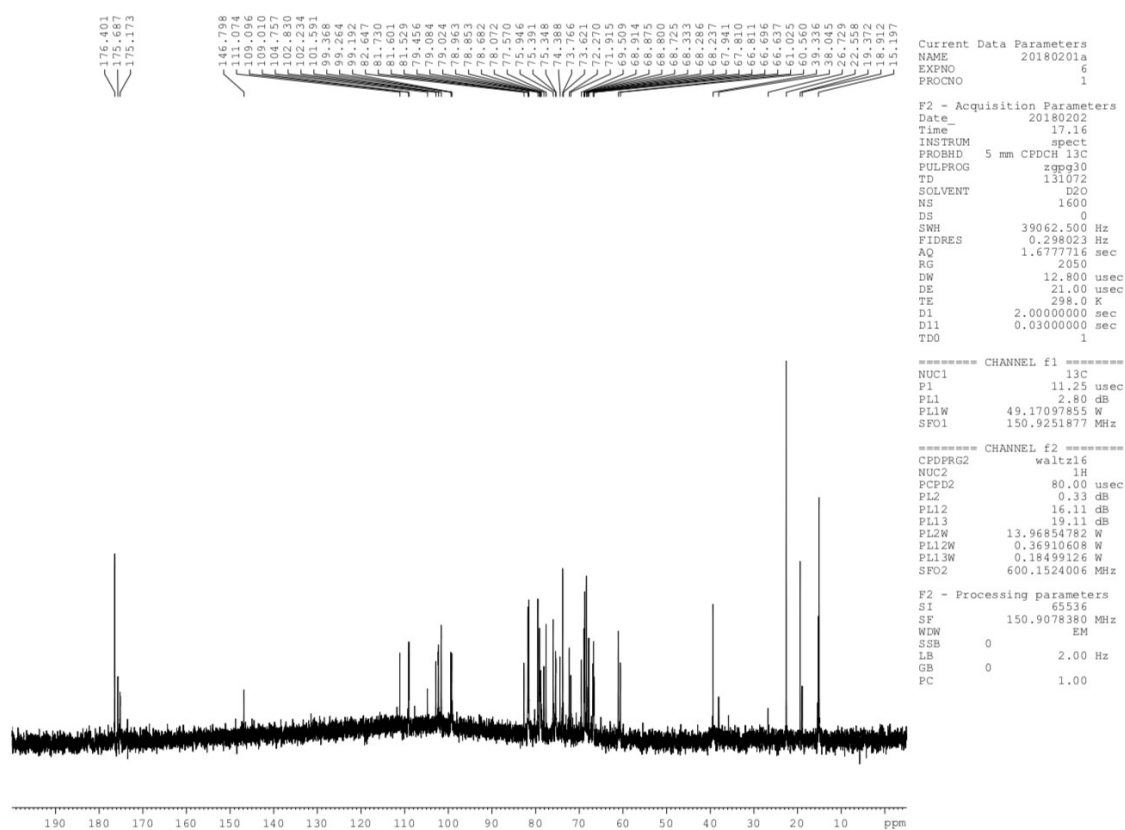

# High-resolution mass spectra of K1-digested CPS-SH

## Analysis Info

Analysis Name D:\0\Raw Data\20120308\Plabu 410 ren\_62\_01\_6653.d  
Method ESI\_Pos\_500-3000  
Sample Name abu 410 ren  
Comment

Acquisition Date 2012/3/8 下午 03:07:29

Operator  
Instrument apex-Ultra

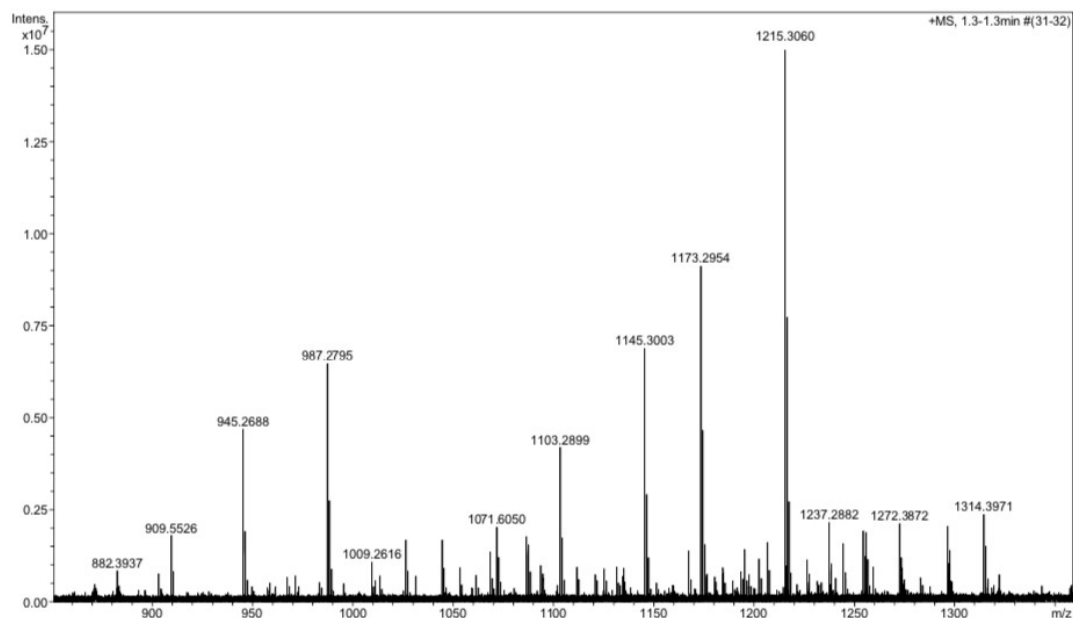

Bruker Daltonics DataAnalysis 3.4

printed: 2012/3/8 下午 04:34:57

Page 1 of 1

## Generic Display Report

## Analysis Info

Analysis Name D:\0\Raw Data\20120308\Plabu 410 ren\_62\_01\_6653.d  
Method ESI\_Pos\_500-3000  
Sample Name abu 410 ren  
Comment

Acquisition Date 2012/3/8 下午 03:07:29

Operator  
Instrument apex-Ultra

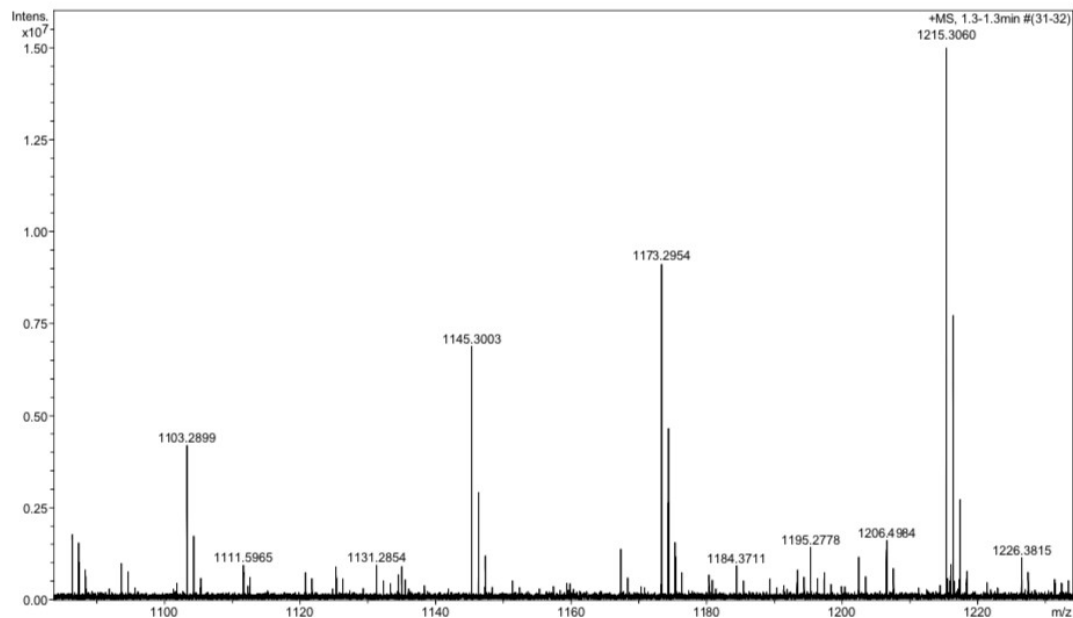

# **<sup>1</sup>H NMR spectra of K2-digested CPS-SH**

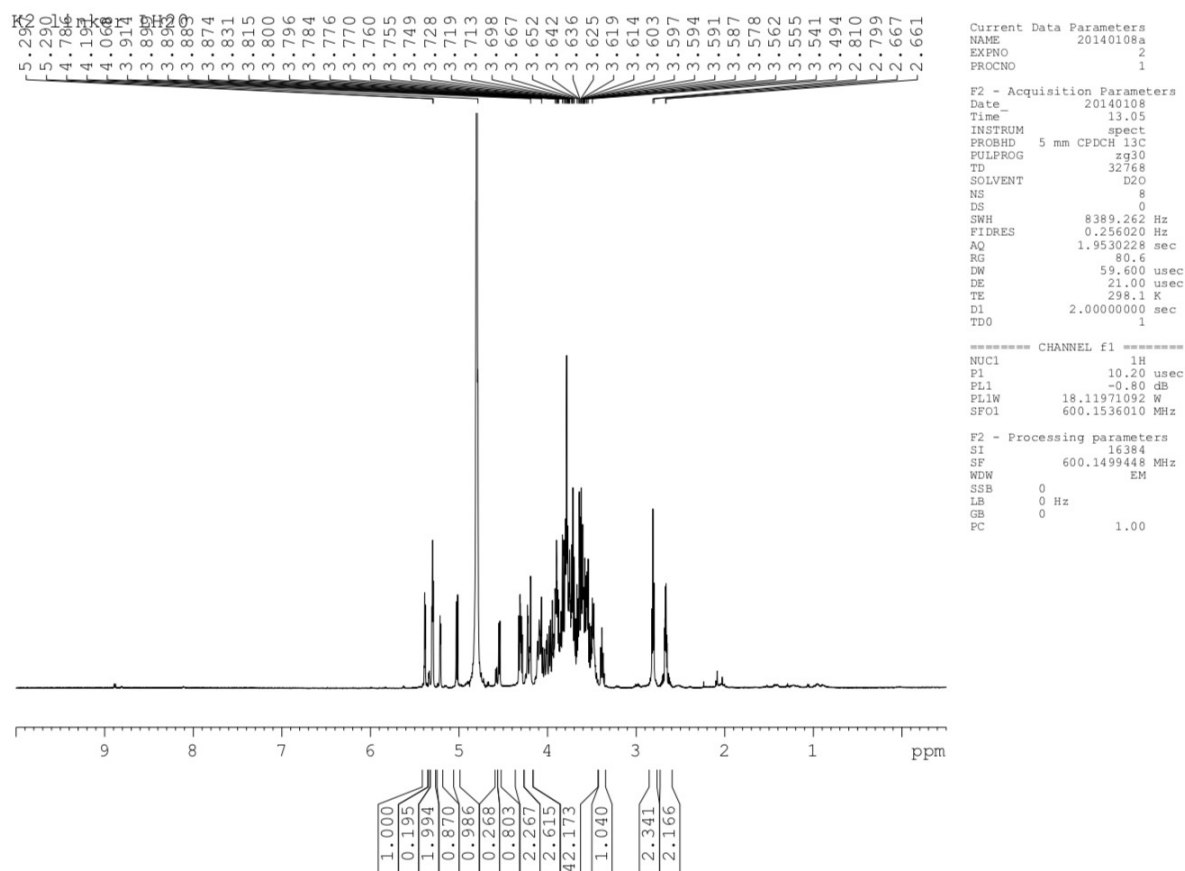

176.485  
176.375  
175.660

102.416  
101.609  
100.820  
99.728  
99.121  
98.959  
82.878  
82.778  
82.362  
81.145  
81.048  
80.862  
80.675  
78.550  
78.450  
77.294  
76.331  
76.120  
75.430  
75.330  
72.981  
72.651  
72.595  
72.211  
72.111  
71.837  
71.642  
71.569  
71.476  
71.377  
71.306  
71.214  
70.803  
70.588  
70.541  
70.251  
70.216  
70.024  
69.767  
65.390  
65.357  
61.003  
60.903  
60.347  
59.553  
59.553  
39.320  
36.137  
19.407

Current Data Parameters  
NAME 20180206a  
EXPNO 4  
PROCNO 1

F2 - Acquisition Parameters  
Date 20180206  
Time 15.48  
INSTRUM spect  
PROBHD 5 mm CPDCH 13C  
PULPROG zgpg30  
TD 131072  
SOLVENT D2O  
NS 721  
DS 0  
SWH 39062.500 Hz  
FIDRES 0.298023 Hz  
AQ 1.6777716 sec  
RG 3640  
DW 12.800 usec  
DE 21.00 usec  
TE 298.1 K  
D1 2.00000000 sec  
D11 0.03000000 sec  
TD0 1

===== CHANNEL f1 =====  
NUC1 13C  
P1 11.25 usec  
PL1 2.80 dB  
PL1W 49.17097855 W  
SFO1 150.9251877 MHz

===== CHANNEL f2 =====  
CPDPRG2 waltz16  
NUC2 1H  
PCPD2 80.00 usec  
PL2 0.33 dB  
PL12 16.11 dB  
PL13 19.11 dB  
PL2W 13.96854782 W  
PL12W 0.36910608 W  
PL13W 0.18490126 W  
SFO2 600.1524006 MHz

F2 - Processing parameters  
SI 65536  
SF 150.9078380 MHz  
WDW EM  
SSB 0  
LB 2.00 Hz  
GB 0  
PC 1.00

190 180 170 160 150 140 130 120 110 100 90 80 70 60 50 40 30 20 10 ppm

## High-resolution mass spectra of K2-digested CPS-SH

K2L-2-REN #42-86 RT: 0.81-1.50 AV: 45 NL: 2.79E6  
T: FTMS + p ESI Full ms [200.00-2000.00]

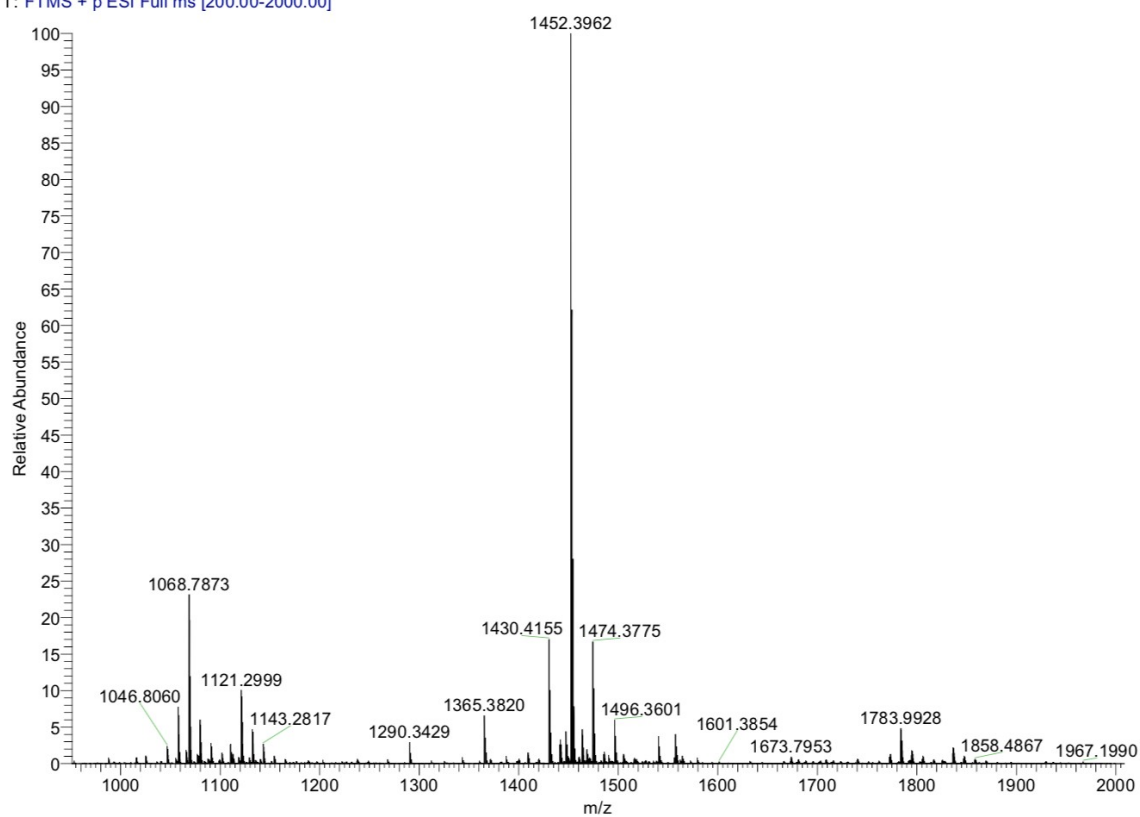

Supplement: Supplementary file [file 34443515]
